# Supplementary figures and images for: Predicting Liver Disease Risk Using a Combination of Common Clinical Markers: A Screening Model from Routine Health Check-Up
Source: Hindawi journal article supplement (doi:10.1155/2020/8460883), 2020-05-31

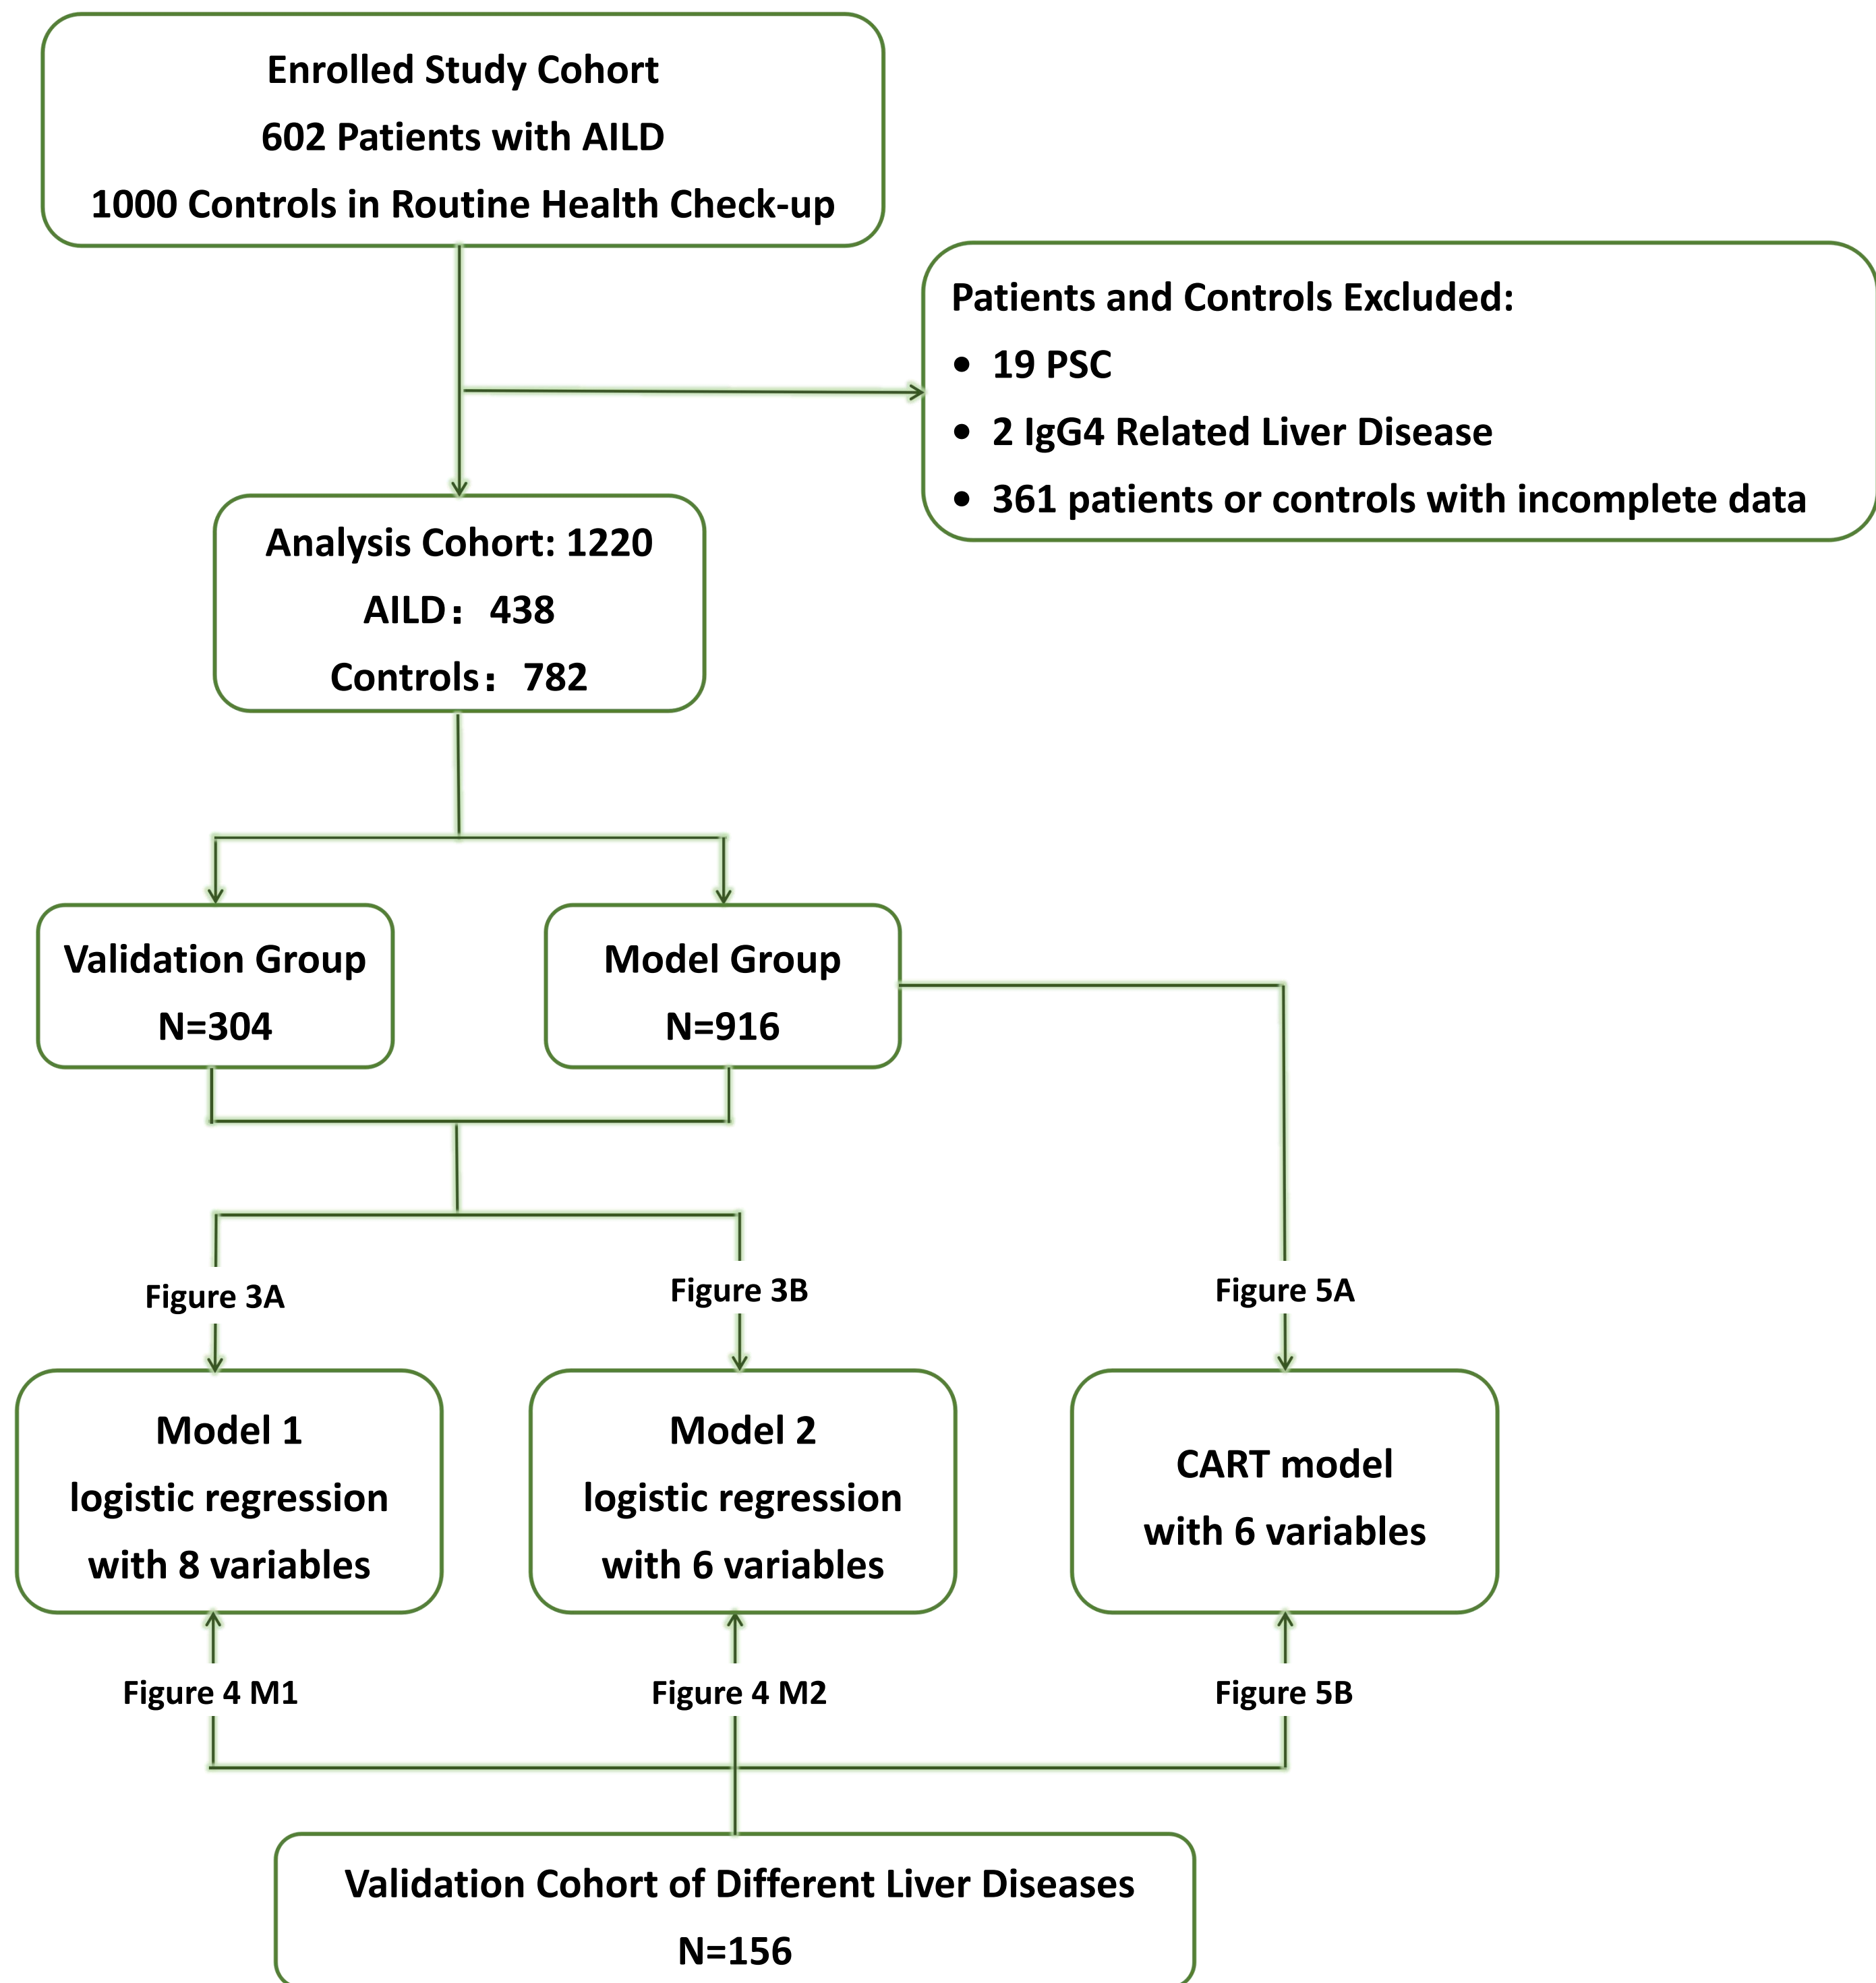

A

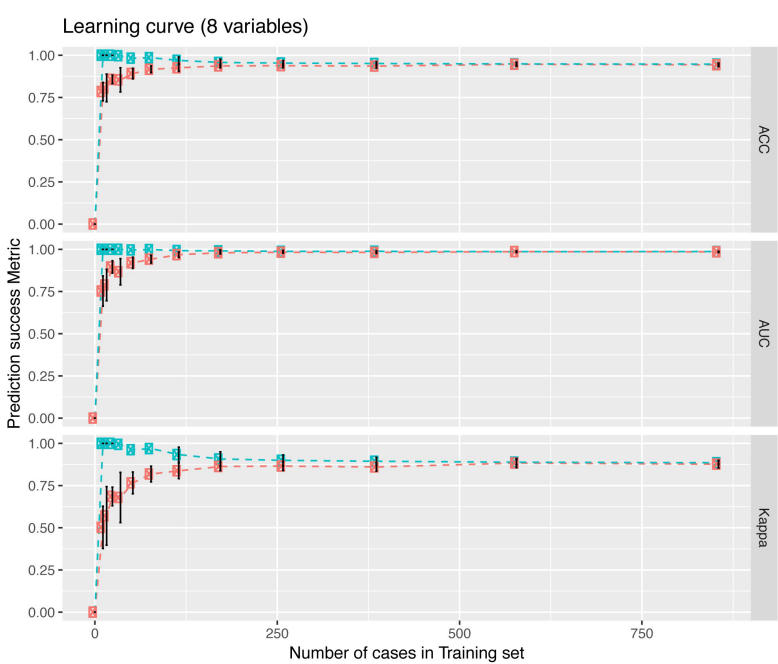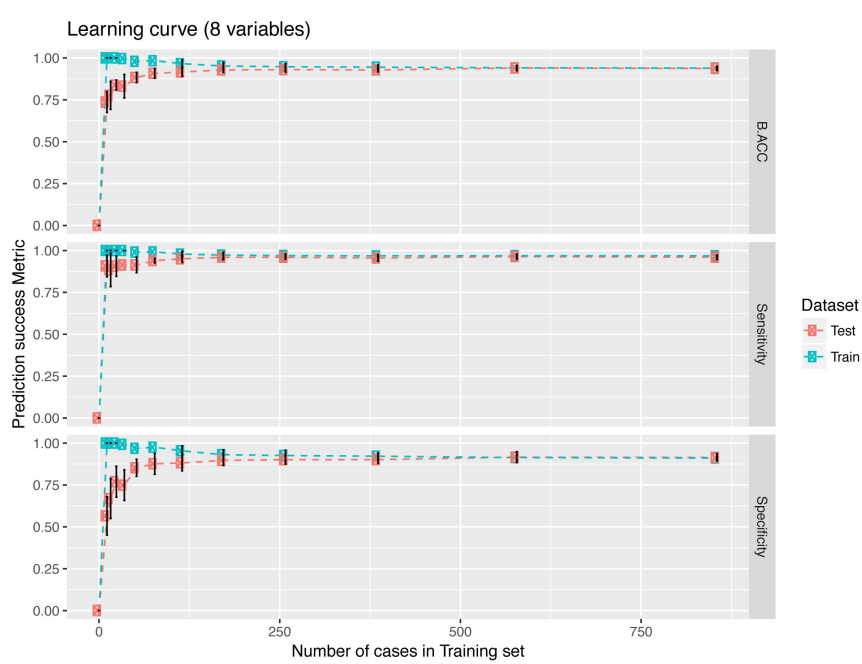

B

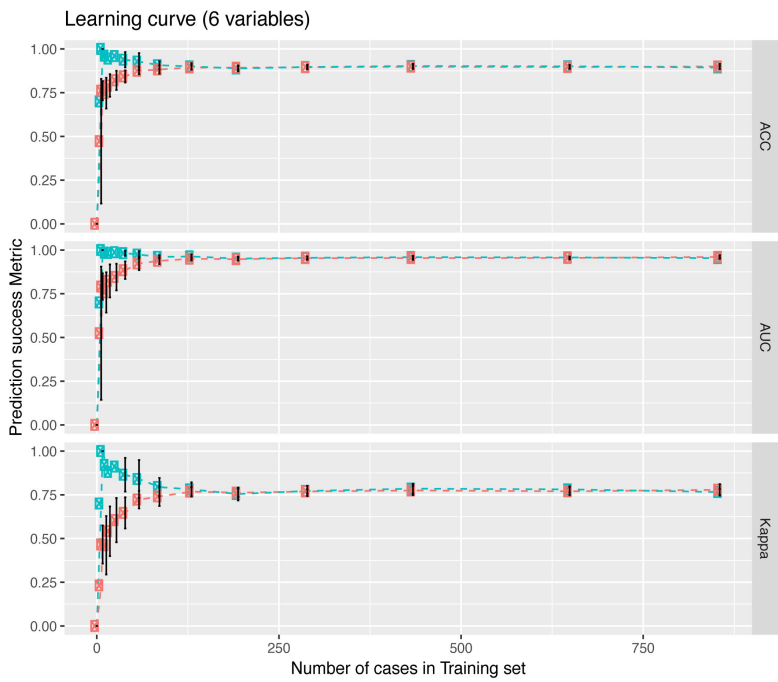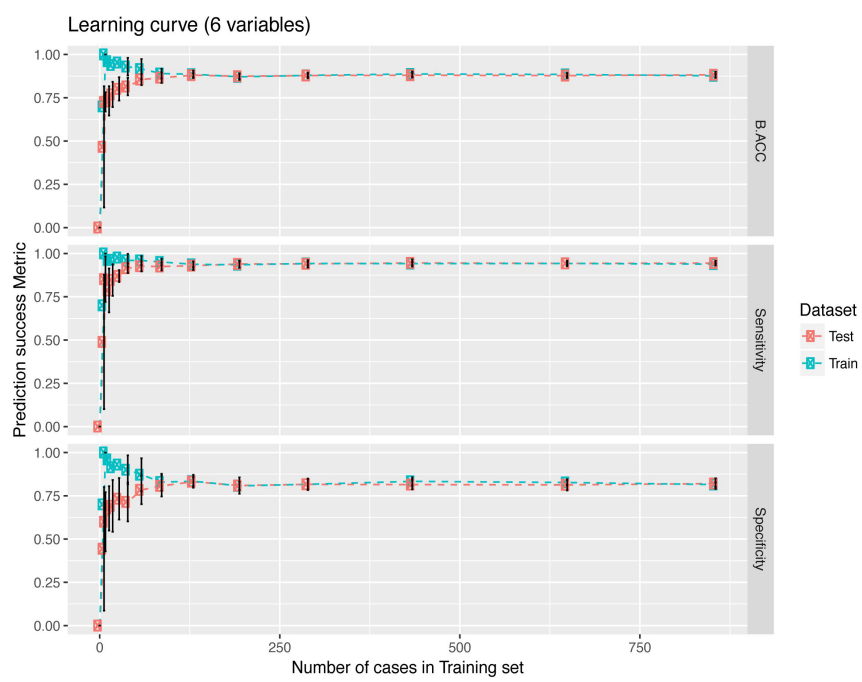

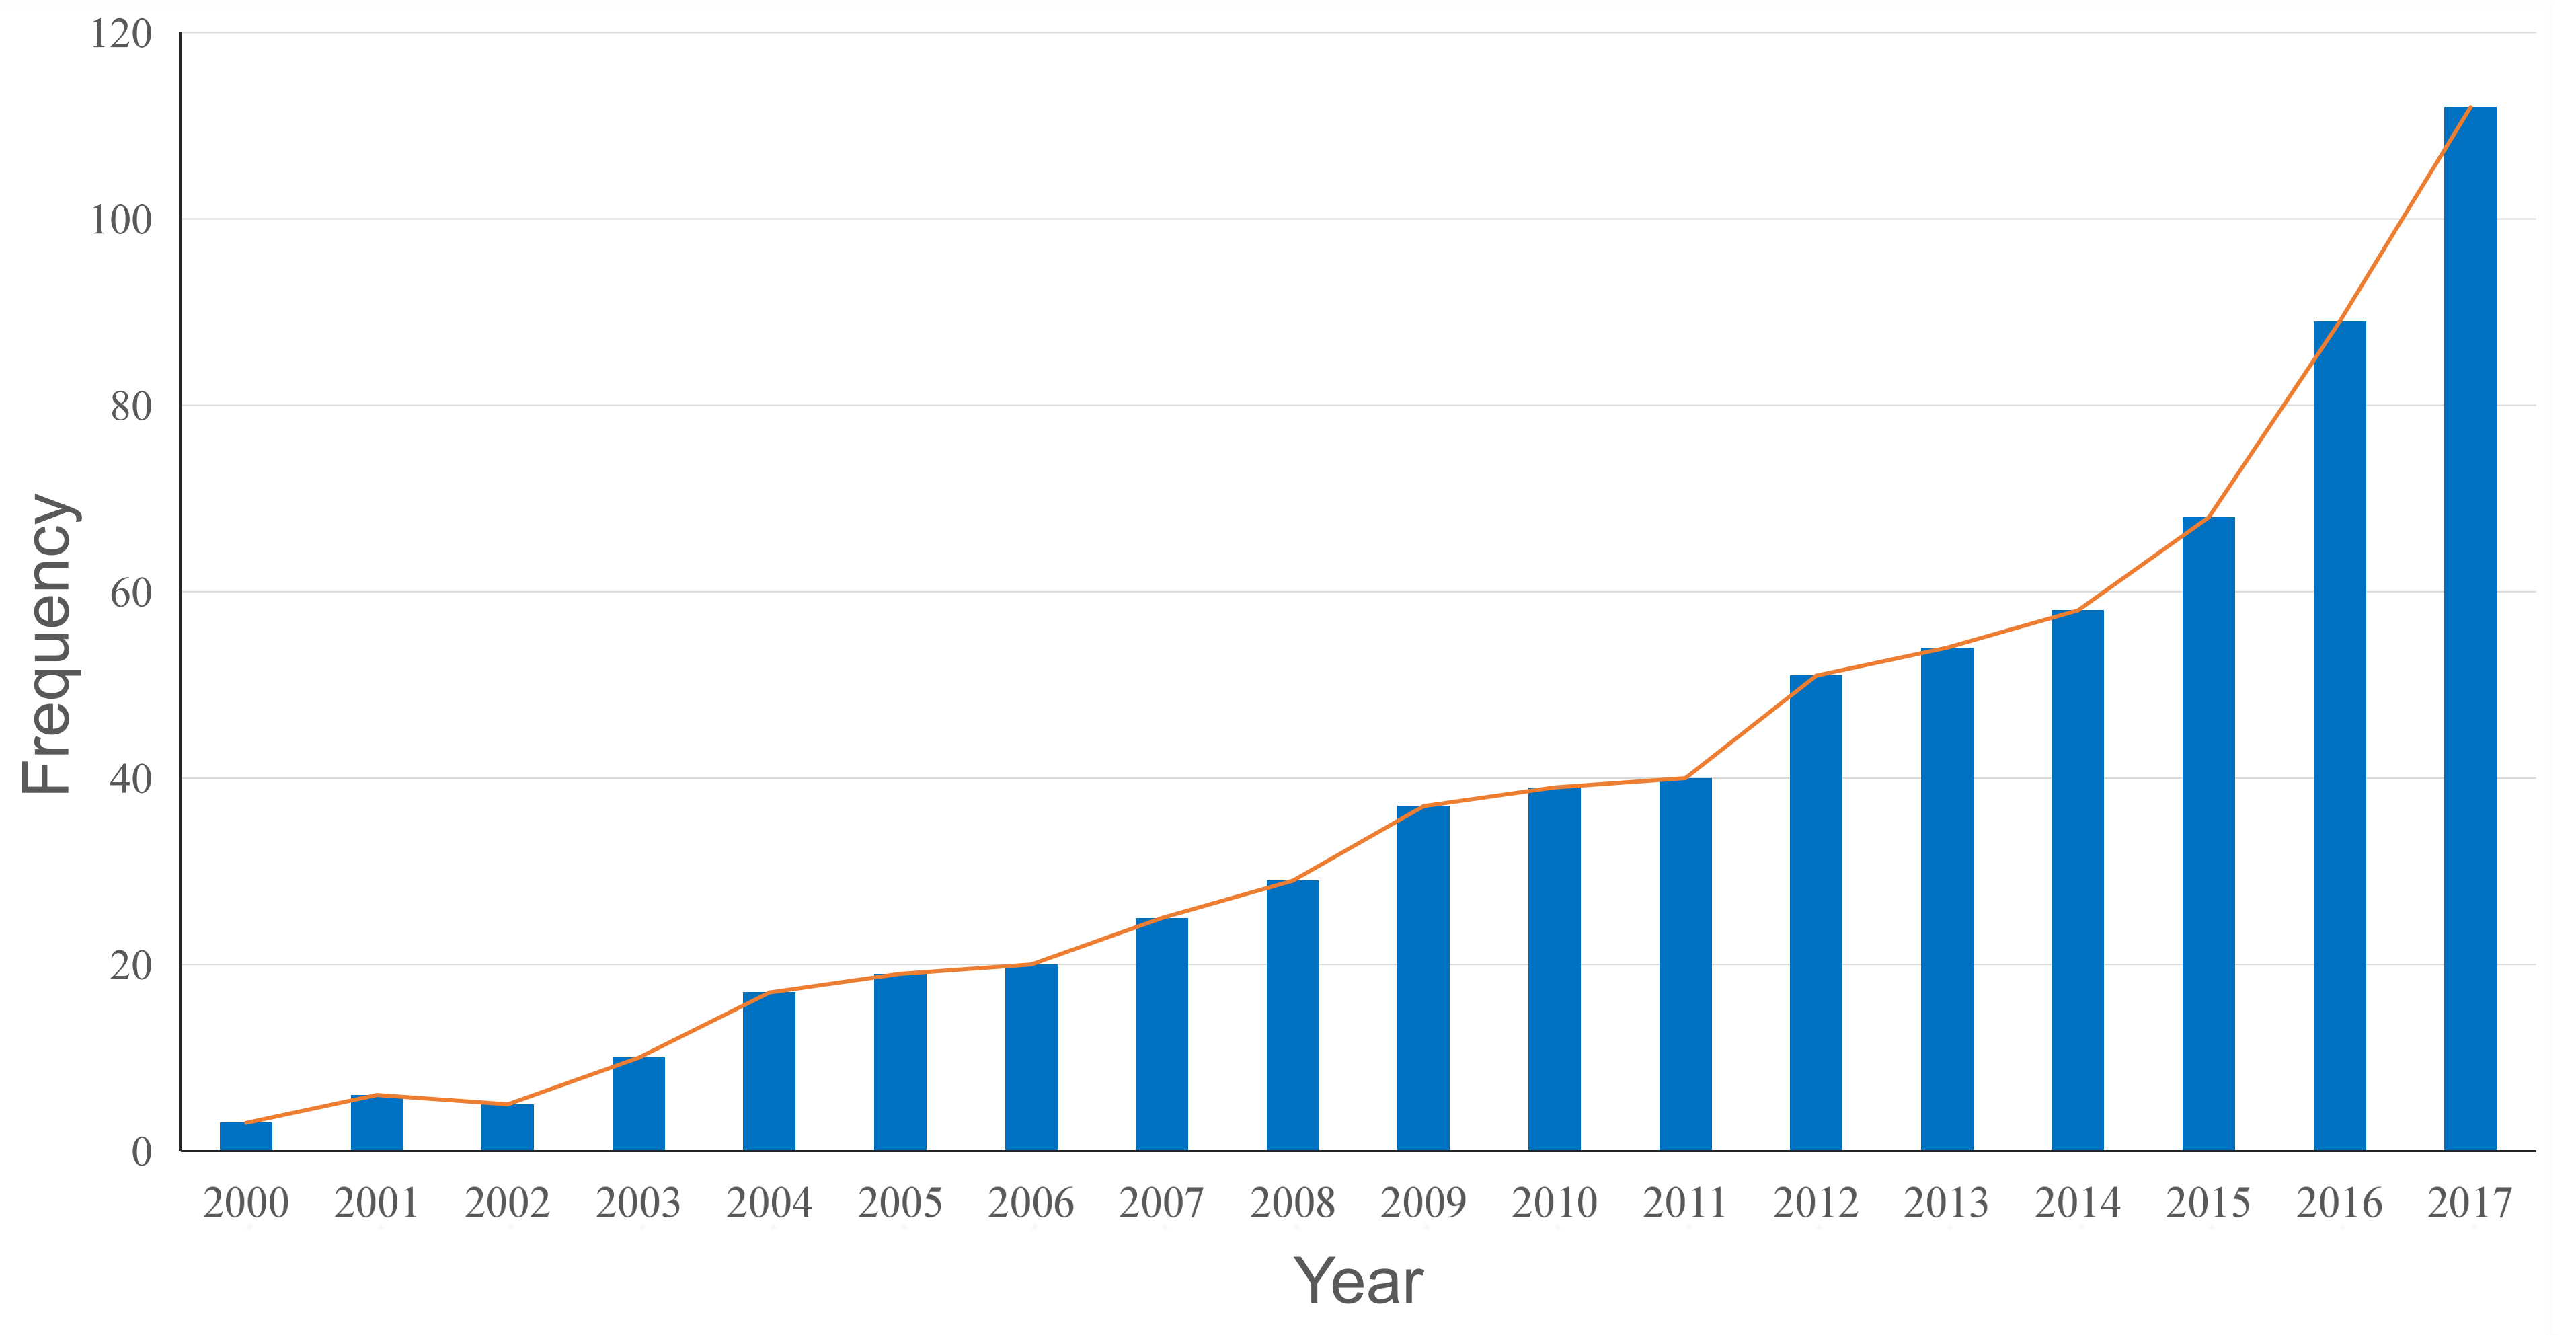

Supplement: f1 [file 8460883.f1.zip]
